# Supplementary material for: A highly active and regioselective cannabigerolic acid synthase engineered from a promiscuous prenyltransferase NphB
Source: Royal Society of Chemistry journal article supplement (doi:10.1039/d4cy01367k), 2025-01-01
Supplement: d4cy01367k1.xlsx [file d4cy01367k1.xlsx]

## Sheet: Sheet1
variant_number	49	162	213	214	232	286	288	295	298	total_score
wild-type	V	M	F	S	A	G	Y	Q	L	-1026.02
1	W	F	F	S	A	A	A	L	L	-1037.89	M1
2	V	F	Y	A	A	E	Y	Q	L	-1037.64	M2
3	V	F	M	R	T	A	Y	Q	L	-1037.59	M3
4	I	F	Y	A	A	A	Y	Q	L	-1037.38	M4
5	I	F	F	A	A	C	Y	Q	L	-1036.54	M5
6	V	F	Y	S	A	E	F	Q	L	-1036.52	M6
7	I	F	F	R	A	S	Y	E	L	-1036.22	M7
8	I	F	F	R	A	Q	F	Q	L	-1036.13	M8
9	M	F	F	A	A	A	Y	L	L	-1036.05	M9
10	I	F	F	S	A	A	F	E	L	-1035.96	M10
11	I	F	Y	S	A	E	Y	E	L	-1035.95
12	V	F	Y	S	A	A	Y	Q	L	-1035.82
13	V	F	Y	S	A	A	Y	L	M	-1035.79
14	I	F	F	S	A	S	F	Q	L	-1035.75
15	V	F	Y	S	S	E	Y	Q	L	-1035.75
16	W	F	F	S	A	Q	A	Q	L	-1035.67
17	V	F	M	R	A	A	Y	Q	M	-1035.65
18	I	F	F	S	A	A	Y	Q	L	-1035.63
19	V	F	F	A	A	E	Y	Q	R	-1035.62
20	W	M	F	R	T	A	A	Q	L	-1035.53
21	I	F	F	R	A	E	Y	Q	L	-1035.47
22	M	F	F	S	A	A	F	L	L	-1035.45
23	I	F	F	R	S	S	Y	Q	L	-1035.44
24	I	M	M	R	S	A	Y	Q	L	-1035.36
25	V	F	F	S	A	S	Y	L	M	-1035.36
26	I	F	Y	S	A	A	Y	V	L	-1035.34
27	I	F	F	A	S	E	Y	Q	L	-1035.34
28	I	M	Y	R	A	E	Y	Q	L	-1035.27
29	V	F	F	A	A	E	F	E	L	-1035.19
30	I	F	Y	S	A	E	Y	Q	M	-1035.11
31	I	F	Y	S	A	Q	Y	Q	L	-1035.11
32	I	F	F	S	A	E	F	Q	M	-1035.07
33	V	F	F	R	A	E	F	Q	L	-1035.07
34	V	F	F	A	A	Q	F	Q	L	-1035.06
35	W	M	F	R	A	N	A	L	L	-1035.04
36	W	F	F	R	A	S	A	Q	L	-1035.04
37	M	F	F	S	S	A	F	Q	L	-1034.99
38	V	F	Y	R	A	Q	F	Q	L	-1034.83
39	V	F	F	R	A	Q	Y	E	L	-1034.81
40	V	F	W	S	A	E	Y	Q	L	-1034.72
41	V	A	M	R	A	A	Y	V	L	-1034.71
42	V	F	Y	S	A	S	F	L	L	-1034.66
43	V	F	Y	S	A	E	Y	Q	F	-1034.64
44	V	F	Y	A	A	C	Y	E	L	-1034.62
45	I	F	F	S	A	S	Y	L	L	-1034.62
46	V	F	M	A	A	S	F	Q	L	-1034.58
47	M	F	Y	A	A	G	F	Q	L	-1034.57
48	V	F	W	A	A	E	F	Q	L	-1034.56
49	I	F	F	A	A	S	Y	I	L	-1034.49
50	V	F	F	A	S	E	F	Q	L	-1034.47
51	I	F	Y	S	A	A	F	Q	L	-1034.45
52	V	F	W	A	A	E	Y	E	L	-1034.44
53	V	F	Y	A	A	A	Y	Q	M	-1034.44
54	I	F	F	S	A	S	Y	Q	M	-1034.43
55	I	M	F	R	T	Q	F	Q	L	-1034.39
56	V	M	M	R	A	E	Y	Q	L	-1034.39
57	M	F	Y	S	A	S	Y	L	L	-1034.39
58	V	F	F	A	S	E	Y	Q	K	-1034.38
59	W	F	M	S	A	A	A	Q	L	-1034.36
60	V	A	M	A	A	E	F	Q	L	-1034.32
61	V	F	F	S	A	E	Y	Q	K	-1034.31
62	V	F	F	A	A	E	F	Q	K	-1034.31
63	I	F	F	A	T	A	Y	Q	L	-1034.29
64	I	A	Y	S	A	E	Y	Q	L	-1034.24
65	I	F	F	S	A	A	Y	E	R	-1034.22
66	I	F	F	A	A	A	Y	E	L	-1034.21
67	V	F	F	A	A	E	Y	E	M	-1034.18
68	V	F	F	R	A	S	Y	L	L	-1034.17
69	M	F	F	A	A	S	F	Q	L	-1034.16
70	V	A	M	A	T	E	Y	Q	L	-1034.15
71	V	L	M	R	A	C	F	Q	L	-1034.13
72	V	F	F	R	A	A	Y	Q	R	-1034.11
73	V	F	F	R	T	A	Y	L	L	-1034.09
74	I	F	Y	S	A	S	Y	I	L	-1034.08
75	V	F	F	S	S	A	Y	L	M	-1034.07
76	V	F	F	R	S	Q	F	Q	L	-1034.06
77	V	M	F	R	A	E	F	E	L	-1034.06
78	M	A	M	A	A	G	Y	L	L	-1034.05
79	M	F	F	R	T	G	Y	L	L	-1034.04
80	M	F	F	A	A	Q	Y	E	L	-1034.04
81	M	F	F	S	A	A	F	Q	A	-1034.02
82	I	F	F	R	A	A	Y	I	L	-1034
83	V	F	Y	S	A	A	F	Q	A	-1034
84	I	M	F	A	A	Q	F	Q	L	-1033.98
85	I	M	F	R	A	S	Y	Q	L	-1033.96
86	V	F	F	S	A	A	F	I	L	-1033.93
87	M	F	F	S	A	A	Y	L	M	-1033.91
88	V	A	F	R	A	E	F	Q	R	-1033.91
89	W	F	F	A	A	A	A	Q	L	-1033.91
90	V	A	M	R	A	Q	Y	Q	M	-1033.89
91	V	F	F	A	S	A	Y	L	L	-1033.88
92	I	F	Y	R	A	C	Y	Q	L	-1033.87
93	V	F	Y	A	T	S	Y	Q	L	-1033.87
94	V	M	Y	R	A	Q	Y	Q	L	-1033.85
95	I	F	F	S	A	E	Y	Q	R	-1033.84
96	W	A	F	R	A	Q	A	Q	L	-1033.82
97	I	F	F	R	A	A	Y	Q	A	-1033.8
98	V	F	F	R	A	A	F	E	L	-1033.79
99	I	F	Y	S	T	E	Y	Q	L	-1033.78
100	M	F	Y	S	A	A	Y	I	L	-1033.78
101	I	F	F	R	A	S	Y	Q	K	-1033.77
102	I	F	W	A	A	S	Y	Q	L	-1033.76
103	M	F	W	A	A	A	Y	Q	L	-1033.76
104	I	M	Y	A	A	E	Y	Q	M	-1033.76
105	V	F	F	S	A	Q	Y	Q	M	-1033.73
106	V	F	F	R	A	Q	F	Q	M	-1033.73
107	M	F	W	S	A	A	F	Q	L	-1033.73
108	I	F	F	S	A	A	Y	V	M	-1033.72
109	I	F	M	S	A	E	Y	Q	L	-1033.72
110	I	A	M	S	T	A	Y	Q	L	-1033.71
111	V	F	F	S	S	E	F	E	L	-1033.71
112	M	F	F	A	A	G	Y	L	M	-1033.71
113	V	F	F	S	T	E	F	Q	L	-1033.69
114	I	F	F	S	T	A	Y	E	L	-1033.68
115	I	M	F	A	A	E	Y	Q	K	-1033.67
116	V	F	F	S	A	E	F	Q	A	-1033.65
117	M	F	F	S	A	S	Y	Q	L	-1033.65
118	V	F	F	R	A	A	Y	E	M	-1033.63
119	V	F	M	R	A	A	F	Q	L	-1033.63
120	I	M	Y	A	A	E	F	Q	L	-1033.63
121	I	F	F	S	S	S	Y	E	L	-1033.62
122	V	F	F	S	S	E	Y	Q	M	-1033.58
123	I	F	Y	R	A	G	F	Q	L	-1033.56
124	I	F	M	R	S	G	Y	Q	L	-1033.55
125	V	A	F	S	A	E	F	E	R	-1033.54
126	M	F	F	S	A	G	F	L	M	-1033.51
127	V	L	M	R	A	E	Y	E	L	-1033.5
128	I	F	F	R	A	C	Y	L	L	-1033.49
129	V	F	Y	A	A	G	Y	L	M	-1033.47
130	I	F	F	S	A	E	F	I	L	-1033.47
131	I	F	F	S	S	A	Y	Q	M	-1033.44
132	I	F	F	S	S	A	Y	L	L	-1033.42
133	V	F	F	A	S	Q	Y	Q	M	-1033.42
134	V	F	Y	R	A	A	Y	V	L	-1033.41
135	I	F	Y	S	A	C	Y	L	L	-1033.4
136	I	F	Y	A	A	G	Y	I	L	-1033.39
137	I	M	M	S	T	E	F	Q	L	-1033.39
138	V	F	W	A	S	E	Y	Q	L	-1033.39
139	I	M	F	R	A	Q	Y	Q	K	-1033.38
140	V	M	Y	R	A	A	F	L	L	-1033.37
141	V	M	Y	A	T	E	Y	Q	L	-1033.36
142	V	F	W	A	A	E	Y	Q	M	-1033.35
143	M	F	F	A	A	G	F	L	L	-1033.35
144	I	F	F	A	A	A	Y	Q	F	-1033.34
145	I	F	W	S	A	A	Y	E	L	-1033.33
146	V	F	Y	R	A	E	Y	E	L	-1033.33
147	W	A	F	A	A	A	F	Q	L	-1033.32
148	V	F	Y	S	A	G	Y	E	L	-1033.32
149	M	F	Y	S	A	A	Y	Q	M	-1033.31
150	W	M	M	R	A	A	H	Q	L	-1033.29
151	I	A	W	A	A	E	Y	Q	L	-1033.29
152	V	F	F	A	S	E	Y	E	L	-1033.27
153	M	F	Y	A	A	G	Y	E	L	-1033.26
154	I	M	Y	R	A	Q	Y	E	L	-1033.26
155	T	F	F	A	A	E	Y	Q	L	-1033.26
156	V	M	F	A	A	Q	Y	L	M	-1033.26
157	I	M	Y	A	A	Q	Y	Q	L	-1033.25
158	I	F	F	S	A	Q	F	Q	R	-1033.24
159	V	F	M	A	S	S	Y	Q	L	-1033.23
160	V	F	M	S	T	A	Y	E	L	-1033.23
161	V	F	Y	S	A	S	Y	Q	A	-1033.23
162	I	F	Y	S	A	C	Y	Q	A	-1033.22
163	I	M	M	R	T	E	Y	Q	L	-1033.22
164	V	F	M	R	A	C	Y	Q	L	-1033.22
165	M	F	F	R	A	A	Y	Q	L	-1033.22
166	V	M	Y	R	T	E	Y	L	L	-1033.22
167	V	F	Y	S	A	E	Y	E	K	-1033.19
168	V	F	F	S	A	E	F	E	K	-1033.18
169	V	F	F	A	A	C	F	L	L	-1033.18
170	V	F	F	S	A	E	F	V	L	-1033.17
171	I	M	F	R	S	E	Y	Q	L	-1033.17
172	V	M	M	R	A	S	Y	V	M	-1033.17
173	I	M	Y	S	S	E	Y	Q	L	-1033.16
174	I	F	M	S	T	S	Y	Q	L	-1033.15
175	V	C	M	R	A	E	Y	Q	M	-1033.15
176	I	A	F	S	S	E	F	Q	L	-1033.15
177	V	F	M	R	S	E	Y	Q	L	-1033.13
178	I	F	F	A	A	E	F	Q	L	-1033.12
179	I	M	F	A	A	E	F	L	L	-1033.12
180	V	M	M	R	T	E	Y	E	L	-1033.11
181	M	F	F	S	T	A	Y	V	L	-1033.1
182	V	F	F	S	A	S	F	L	F	-1033.09
183	I	F	F	S	T	E	Y	Q	M	-1033.08
184	I	F	F	S	A	E	Y	V	K	-1033.07
185	V	F	F	R	A	S	F	Q	A	-1033.07
186	I	M	M	A	A	S	Y	Q	M	-1033.04
187	M	F	M	R	A	G	Y	E	L	-1033.04
188	I	M	M	R	A	C	Y	E	L	-1033.02
189	V	A	F	A	A	E	Y	E	K	-1033.02
190	I	F	Y	S	A	A	Y	Q	K	-1033.01
191	W	F	F	S	A	A	F	Q	L	-1033.01
192	I	M	Y	S	A	E	Y	Q	A	-1032.97
193	V	A	F	R	A	Q	F	E	L	-1032.97
194	I	A	Y	A	A	S	Y	Q	L	-1032.97
195	I	M	F	R	A	E	F	Q	L	-1032.97
196	V	F	F	S	A	E	Y	M	L	-1032.96
197	V	F	Y	S	A	A	F	M	L	-1032.96
198	V	F	Y	A	A	A	F	Q	L	-1032.94
199	M	F	F	A	S	G	Y	E	L	-1032.93
200	V	F	Y	R	A	N	Y	Q	L	-1032.92
201	I	A	M	R	A	E	Y	Q	L	-1032.92
202	V	A	M	R	A	Q	Y	L	L	-1032.9
203	I	M	F	S	A	E	F	E	L	-1032.9
204	I	F	F	S	A	E	H	Q	L	-1032.89
205	I	L	F	R	A	A	Y	E	L	-1032.87
206	W	F	F	S	T	A	A	Q	L	-1032.87
207	M	M	M	R	T	G	Y	V	L	-1032.86
208	V	F	Y	S	T	A	Y	L	L	-1032.85
209	V	F	F	A	A	S	Y	M	M	-1032.85
210	V	F	Y	S	S	Q	Y	E	L	-1032.84
211	I	F	F	S	A	C	Y	E	L	-1032.83
212	V	F	F	A	A	C	Y	E	K	-1032.79
213	I	A	M	S	A	C	Y	Q	L	-1032.78
214	V	M	F	R	S	E	F	I	L	-1032.78
215	I	F	F	R	A	G	F	E	L	-1032.78
216	I	A	F	A	A	A	Y	Q	K	-1032.77
217	I	M	F	R	T	E	Y	L	L	-1032.76
218	V	F	F	S	A	Q	Y	L	L	-1032.76
219	V	F	W	S	S	E	F	Q	L	-1032.76
220	V	A	Y	A	A	S	Y	L	L	-1032.76
221	V	F	Y	R	T	Q	Y	Q	L	-1032.75
222	V	F	W	S	A	E	F	Q	M	-1032.74
223	W	A	F	S	A	A	F	E	L	-1032.73
224	M	F	M	A	A	S	Y	Q	L	-1032.73
225	I	A	F	A	A	E	Y	Q	M	-1032.72
226	M	F	Y	R	A	E	Y	Q	L	-1032.72
227	M	A	F	S	T	G	Y	L	M	-1032.71
228	I	F	F	S	A	Q	Y	E	M	-1032.71
229	I	M	Y	R	T	Q	Y	Q	L	-1032.69
230	V	F	F	S	A	A	Y	E	L	-1032.68
231	V	A	Y	S	A	N	Y	Q	L	-1032.67
232	V	F	W	A	A	N	Y	Q	L	-1032.67
233	M	F	F	A	A	G	Y	Q	A	-1032.66
234	V	F	F	S	S	C	Y	E	L	-1032.66
235	V	M	Y	R	S	E	Y	Q	L	-1032.65
236	I	F	F	R	A	A	H	Q	L	-1032.65
237	V	F	F	S	A	A	F	L	R	-1032.64
238	W	M	F	S	A	Q	A	L	K	-1032.64
239	V	F	M	R	A	A	Y	E	L	-1032.64
240	V	A	Y	R	T	S	Y	Q	L	-1032.63
241	M	F	Y	S	T	S	Y	Q	L	-1032.63
242	M	F	Y	S	A	G	F	Q	M	-1032.61
243	V	F	F	A	A	E	H	Q	L	-1032.6
244	V	F	F	A	A	S	Y	L	K	-1032.58
245	M	F	Y	A	A	G	Y	Q	R	-1032.58
246	W	M	F	R	A	A	H	E	L	-1032.57
247	M	F	F	R	A	Q	Y	Q	A	-1032.57
248	W	F	F	S	S	E	A	Q	L	-1032.56
249	T	F	Y	S	A	E	Y	Q	L	-1032.55
250	T	F	F	A	A	S	Y	L	L	-1032.55
251	I	M	Y	R	S	S	Y	Q	L	-1032.54
252	I	F	W	S	A	Q	Y	Q	M	-1032.54
253	V	M	F	R	A	S	F	Q	L	-1032.52
254	V	F	Y	A	A	S	Y	V	L	-1032.52
255	I	F	F	R	T	Q	Y	Q	L	-1032.51
256	V	F	F	S	A	Q	F	L	M	-1032.51
257	V	F	F	R	A	Q	Y	Q	K	-1032.5
258	V	F	F	A	A	E	Y	L	L	-1032.49
259	V	M	M	R	A	N	F	Q	L	-1032.48
260	V	F	F	S	A	Q	F	E	L	-1032.48
261	V	M	F	R	A	E	F	Q	M	-1032.47
262	I	F	W	S	A	E	Y	I	L	-1032.47
263	V	A	F	A	A	C	Y	V	L	-1032.46
264	V	F	F	S	A	Q	Y	E	K	-1032.45
265	M	M	Y	R	T	G	Y	Q	M	-1032.45
266	I	M	Y	R	A	Q	F	Q	L	-1032.45
267	M	F	F	S	T	G	F	Q	L	-1032.42
268	I	M	M	S	A	S	Y	E	M	-1032.42
269	I	M	Y	R	A	A	Y	L	L	-1032.41
270	V	F	Y	S	A	E	Y	V	L	-1032.41
271	V	F	F	R	T	E	Y	Q	L	-1032.4
272	V	F	Y	S	A	C	F	Q	K	-1032.4
273	I	M	F	S	A	Q	F	Q	K	-1032.39
274	V	A	F	A	A	S	F	L	L	-1032.39
275	V	L	F	R	A	E	Y	L	L	-1032.37
276	I	L	F	R	S	Q	Y	Q	L	-1032.36
277	V	F	F	S	T	S	Y	Q	L	-1032.36
278	M	F	F	S	T	C	Y	L	L	-1032.35
279	I	F	F	S	A	A	Y	L	K	-1032.33
280	I	M	F	S	A	E	F	Q	R	-1032.33
281	V	F	W	A	A	C	Y	L	L	-1032.32
282	V	F	F	S	S	C	F	Q	M	-1032.31
283	I	F	F	S	T	S	Y	I	L	-1032.3
284	V	F	F	A	A	A	F	Q	A	-1032.3
285	V	M	Y	R	A	N	Y	Q	A	-1032.28
286	V	M	M	A	A	Q	Y	Q	L	-1032.28
287	V	M	Y	R	A	E	Y	Q	M	-1032.27
288	I	A	F	S	A	Q	Y	L	M	-1032.27
289	I	M	F	R	A	C	Y	E	I	-1032.27
290	V	M	Y	R	A	E	F	Q	L	-1032.27
291	M	M	M	S	T	A	Y	I	L	-1032.26
292	M	F	F	R	A	Q	Y	I	L	-1032.26
293	I	M	F	R	A	A	F	I	L	-1032.26
294	V	F	M	S	T	E	Y	Q	L	-1032.25
295	V	F	F	R	S	S	Y	E	L	-1032.24
296	I	F	Y	S	A	G	H	Q	L	-1032.24
297	I	F	F	S	A	A	F	Q	K	-1032.24
298	I	C	F	R	T	E	Y	Q	L	-1032.23
299	V	F	F	S	T	A	F	L	L	-1032.23
300	I	M	F	S	T	E	Y	Q	L	-1032.23
301	M	F	Y	S	A	G	F	E	L	-1032.22
302	W	F	F	A	A	G	A	L	L	-1032.22
303	V	F	F	S	S	E	Y	E	K	-1032.22
304	V	F	F	A	A	N	Y	Q	A	-1032.21
305	V	F	F	R	A	E	Y	E	K	-1032.2
306	I	M	F	S	A	A	Y	E	L	-1032.2
307	I	A	W	R	A	S	Y	Q	L	-1032.2
308	V	F	F	S	A	E	Y	E	R	-1032.2
309	I	L	Y	R	A	A	Y	Q	L	-1032.18
310	I	M	Y	R	A	A	Y	Q	M	-1032.17
311	I	F	M	R	A	N	Y	Q	L	-1032.17
312	V	F	S	S	S	E	Y	Q	R	-1032.16
313	V	C	M	R	A	A	Y	L	L	-1032.15
314	M	F	F	S	A	S	F	Q	R	-1032.15
315	I	F	F	S	A	E	Y	L	M	-1032.15
316	V	F	F	A	T	S	F	Q	L	-1032.15
317	V	F	M	A	A	A	Y	L	L	-1032.14
318	V	F	M	S	A	Q	Y	Q	L	-1032.14
319	I	F	W	S	A	E	Y	Q	A	-1032.13
320	M	A	F	R	A	E	F	Q	L	-1032.13
321	W	A	Y	S	A	S	F	Q	L	-1032.13
322	I	M	F	S	A	E	Y	Q	M	-1032.12
323	V	F	F	S	T	E	Y	E	L	-1032.12
324	V	F	F	S	S	Q	Y	Q	L	-1032.11
325	V	F	F	A	A	E	Y	V	A	-1032.1
326	V	A	Y	A	A	Q	F	Q	L	-1032.09
327	V	F	M	A	A	A	Y	Q	K	-1032.09
328	I	M	S	R	A	E	Y	Q	R	-1032.08
329	M	F	M	R	T	G	Y	Q	L	-1032.08
330	W	F	F	S	A	G	A	L	M	-1032.08
331	W	M	F	S	A	N	A	L	M	-1032.07
332	V	F	F	R	A	A	F	Q	K	-1032.07
333	W	F	Y	R	A	G	A	Q	L	-1032.07
334	V	F	Y	S	T	E	Y	Q	M	-1032.06
335	I	F	F	A	A	S	Y	Q	I	-1032.06
336	V	F	W	A	T	A	Y	Q	L	-1032.05
337	I	F	F	R	A	G	F	Q	M	-1032.05
338	I	M	F	A	T	A	Y	E	L	-1032.05
339	V	F	F	S	S	E	Y	L	L	-1032.04
340	W	A	F	S	S	A	F	Q	L	-1032.04
341	I	M	F	R	A	S	F	E	L	-1032.03
342	M	F	F	A	A	S	Y	Q	M	-1032.02
343	I	A	F	S	A	Q	Y	Q	L	-1032.02
344	I	F	Y	S	S	A	Y	Q	L	-1032.01
345	V	A	Y	R	A	Q	Y	E	L	-1032.01
346	M	M	M	A	A	A	Y	I	L	-1032.01
347	V	F	F	R	T	G	F	V	L	-1032.01
348	I	L	F	R	T	C	Y	Q	L	-1032.01
349	V	F	F	A	A	S	Y	E	L	-1032
350	I	M	F	R	A	Q	Y	L	L	-1032
351	I	M	W	A	A	Q	Y	E	L	-1031.99
352	I	F	F	R	A	C	Y	Q	M	-1031.99
353	M	F	Y	S	A	G	Y	L	M	-1031.98
354	V	F	F	A	T	E	Y	Q	M	-1031.97
355	V	F	F	S	A	A	F	Q	M	-1031.97
356	M	F	F	R	T	C	Y	Q	L	-1031.96
357	V	F	F	S	A	E	F	M	M	-1031.96
358	I	M	F	S	A	A	F	Q	L	-1031.96
359	V	F	Y	S	A	Q	Y	E	A	-1031.96
360	I	A	F	S	A	E	Y	Q	A	-1031.95
361	W	M	Y	R	A	A	A	Q	L	-1031.95
362	I	A	F	S	T	S	Y	E	L	-1031.94
363	W	C	F	R	A	A	F	Q	L	-1031.93
364	I	F	M	A	T	G	Y	Q	L	-1031.92
365	V	A	F	R	A	E	Y	E	A	-1031.91
366	V	F	M	R	A	E	Y	Q	R	-1031.9
367	I	M	F	A	S	A	Y	Q	L	-1031.9
368	V	F	F	S	T	G	F	L	M	-1031.9
369	V	M	Y	R	A	A	F	Q	M	-1031.9
370	T	F	F	S	A	E	Y	L	L	-1031.9
371	W	M	F	S	A	A	A	L	A	-1031.89
372	W	F	F	S	A	K	A	E	L	-1031.88
373	V	F	F	R	A	Q	F	L	L	-1031.88
374	I	M	F	R	A	N	Y	E	L	-1031.87
375	M	F	F	S	A	E	F	E	L	-1031.87
376	I	A	F	R	A	S	Y	Q	M	-1031.86
377	I	M	F	A	T	E	Y	Q	M	-1031.86
378	I	F	W	R	A	Q	Y	Q	L	-1031.86
379	I	F	M	S	A	S	Y	Q	K	-1031.86
380	V	F	F	R	G	A	Y	E	L	-1031.85
381	W	M	F	A	A	S	A	L	L	-1031.85
382	V	F	F	S	S	S	Y	L	K	-1031.84
383	I	L	F	R	A	N	F	Q	L	-1031.84
384	M	F	Y	S	A	G	Y	I	K	-1031.83
385	V	F	F	A	A	Q	Y	Q	F	-1031.83
386	I	M	F	R	T	Q	Y	E	L	-1031.83
387	W	M	Y	R	A	C	F	Q	L	-1031.83
388	V	F	F	R	A	S	F	V	L	-1031.83
389	V	M	F	R	A	A	Y	E	L	-1031.83
390	V	A	F	A	A	A	Y	L	M	-1031.83
391	V	M	Y	R	T	N	Y	E	L	-1031.83
392	V	F	Y	A	S	C	Y	Q	L	-1031.83
393	I	M	F	R	A	A	F	Q	M	-1031.82
394	I	A	F	S	A	A	Y	Q	R	-1031.82
395	V	F	Y	R	A	C	Y	L	L	-1031.81
396	V	M	F	R	S	E	Y	Q	M	-1031.81
397	V	F	F	A	T	C	Y	E	L	-1031.81
398	I	A	F	A	A	A	Y	V	L	-1031.81
399	I	L	F	R	A	E	Y	Q	I	-1031.81
400	M	F	W	S	A	G	Y	Q	L	-1031.8
401	I	F	F	S	A	Q	F	L	L	-1031.8
402	I	M	F	A	A	S	Y	L	M	-1031.79
403	V	A	W	R	S	E	Y	Q	L	-1031.79
404	V	F	Y	S	A	S	F	Q	M	-1031.79
405	V	A	F	S	S	Q	F	L	L	-1031.78
406	V	F	F	A	T	S	Y	L	L	-1031.78
407	V	F	F	A	A	A	Y	Q	L	-1031.78
408	V	F	W	S	A	E	F	E	L	-1031.78
409	I	F	F	S	A	Q	Y	Q	K	-1031.77
410	V	F	S	A	A	E	Y	Q	A	-1031.77
411	W	M	M	S	A	S	A	L	L	-1031.77
412	M	A	M	S	A	A	Y	V	L	-1031.76
413	V	F	F	R	T	G	Y	E	L	-1031.76
414	V	F	M	S	A	A	F	Q	R	-1031.76
415	V	F	W	R	A	S	Y	Q	L	-1031.76
416	I	A	F	A	A	S	Y	E	L	-1031.76
417	W	M	F	A	A	N	A	Q	L	-1031.76
418	V	F	F	S	A	A	Y	I	A	-1031.76
419	I	M	F	R	A	E	Y	L	M	-1031.75
420	W	F	Y	S	A	N	A	Q	L	-1031.74
421	I	M	Y	A	A	S	Y	L	L	-1031.73
422	I	A	F	A	A	N	Y	Q	L	-1031.72
423	V	L	Y	R	A	E	Y	V	L	-1031.72
424	V	A	F	A	A	Q	Y	Q	K	-1031.72
425	V	F	W	A	A	A	Y	Q	R	-1031.71
426	V	F	M	S	A	A	Y	V	L	-1031.71
427	I	F	F	A	A	E	Y	Q	A	-1031.71
428	I	A	Y	S	A	S	Y	Q	M	-1031.7
429	I	M	F	R	T	A	Y	Q	L	-1031.69
430	I	F	F	A	T	G	Y	E	L	-1031.69
431	M	M	F	R	A	A	F	Q	L	-1031.69
432	V	F	M	S	A	S	F	Q	K	-1031.68
433	V	M	Y	R	A	S	F	E	L	-1031.68
434	I	F	F	S	T	A	Y	Q	R	-1031.68
435	W	M	F	R	A	Q	A	E	L	-1031.68
436	V	F	F	R	A	C	Y	E	R	-1031.67
437	I	F	F	S	A	S	Y	M	K	-1031.67
438	W	M	M	R	A	Q	A	Q	L	-1031.66
439	V	F	F	R	A	G	Y	V	L	-1031.66
440	I	M	Y	S	T	S	Y	E	L	-1031.66
441	I	M	F	R	S	S	Y	Q	M	-1031.65
442	V	F	Y	S	A	E	H	Q	K	-1031.65
443	V	F	F	A	A	G	Y	E	A	-1031.64
444	I	M	S	A	A	E	Y	E	L	-1031.63
445	I	F	S	S	A	S	Y	Q	L	-1031.62
446	I	F	F	R	S	G	Y	E	L	-1031.62
447	V	A	M	A	A	E	Y	E	L	-1031.62
448	V	F	F	S	S	E	F	Q	K	-1031.61
449	I	M	Y	S	A	E	Y	E	K	-1031.61
450	I	F	F	S	S	S	Y	Q	A	-1031.61
451	I	F	Y	R	T	G	Y	Q	L	-1031.6
452	I	F	F	A	A	S	V	Q	L	-1031.6
453	V	A	Y	S	A	Q	Y	L	L	-1031.6
454	I	F	F	S	S	C	Y	I	L	-1031.59
455	I	M	Y	A	T	A	Y	Q	L	-1031.59
456	W	F	F	S	A	A	A	Q	M	-1031.59
457	V	M	Y	A	A	E	Y	V	K	-1031.59
458	W	M	F	A	A	A	A	Q	M	-1031.58
459	W	F	W	S	A	G	A	L	L	-1031.58
460	V	F	Y	R	A	C	Y	Q	K	-1031.57
461	I	F	F	A	A	N	Y	Q	M	-1031.56
462	W	L	F	R	A	A	A	Q	L	-1031.56
463	M	F	F	R	A	E	Y	Q	M	-1031.56
464	V	M	F	R	T	A	F	Q	M	-1031.55
465	V	F	Y	A	A	G	Y	Q	K	-1031.54
466	I	F	F	R	A	Q	Y	Q	R	-1031.53
467	W	A	F	S	A	A	F	Q	M	-1031.53
468	V	F	F	R	A	E	Y	V	M	-1031.51
469	I	C	F	S	A	E	Y	Q	L	-1031.51
470	I	F	W	S	A	Q	F	Q	L	-1031.5
471	I	L	F	A	A	A	F	Q	L	-1031.5
472	I	A	F	S	S	Q	Y	E	L	-1031.5
473	V	F	Y	S	A	C	Y	L	K	-1031.5
474	V	F	Y	S	A	S	Y	L	F	-1031.49
475	V	F	Y	A	A	C	Y	Q	F	-1031.49
476	I	M	F	R	A	E	V	Q	M	-1031.49
477	I	F	F	A	A	G	H	E	L	-1031.49
478	I	F	F	S	A	G	F	Q	F	-1031.49
479	M	A	F	R	A	Q	Y	Q	L	-1031.49
480	V	M	M	R	A	E	F	M	L	-1031.47
481	I	F	F	A	A	G	F	I	L	-1031.46
482	I	A	Y	S	T	S	Y	Q	L	-1031.46
483	V	F	W	S	A	Q	Y	L	M	-1031.46
484	M	F	F	S	S	G	F	Q	A	-1031.45
485	V	M	M	A	A	E	Y	Q	K	-1031.45
486	I	A	F	S	A	Q	F	E	L	-1031.44
487	I	M	F	R	S	A	F	Q	L	-1031.44
488	V	F	W	A	A	Q	Y	Q	I	-1031.44
489	I	M	F	R	A	E	Y	Q	A	-1031.43
490	I	M	F	R	A	E	Y	M	L	-1031.42
491	V	M	M	R	S	E	F	Q	L	-1031.42
492	V	M	Y	A	S	N	Y	Q	L	-1031.41
493	M	F	M	S	A	S	F	Q	L	-1031.41
494	I	M	F	R	S	A	Y	E	L	-1031.4
495	V	F	F	A	A	S	Y	V	R	-1031.39
496	V	F	Y	S	S	Q	F	Q	L	-1031.39
497	M	F	M	S	A	G	F	L	L	-1031.39
498	V	A	Y	S	A	A	Y	L	I	-1031.38
499	V	F	F	S	A	C	Y	V	L	-1031.38
500	V	M	F	A	A	E	Y	V	L	-1031.38
501	V	F	Y	S	S	C	Y	L	L	-1031.38
502	V	F	W	S	T	Q	F	Q	L	-1031.37
503	I	M	M	R	A	E	H	Q	L	-1031.37
504	V	M	F	R	A	Q	F	Q	R	-1031.37
505	V	F	F	S	S	C	F	L	L	-1031.37
506	V	M	Y	A	A	E	F	M	L	-1031.37
507	V	M	F	R	S	S	Y	Q	L	-1031.36
508	I	F	F	A	A	G	Y	V	K	-1031.36
509	V	F	F	R	A	C	Y	Q	A	-1031.36
510	V	A	F	A	T	A	Y	L	L	-1031.36
511	V	F	F	A	S	S	Y	Q	I	-1031.36
512	I	F	F	S	S	G	F	E	L	-1031.36
513	I	F	M	S	A	G	F	Q	K	-1031.35
514	V	F	W	S	A	E	Y	E	M	-1031.35
515	I	M	Y	S	A	E	F	Q	M	-1031.35
516	I	A	F	S	S	E	Y	Q	K	-1031.34
517	W	F	Y	S	A	A	H	Q	L	-1031.34
518	V	A	F	S	A	N	F	E	L	-1031.33
519	V	F	F	S	S	E	H	Q	L	-1031.33
520	V	F	F	R	A	C	F	Q	R	-1031.33
521	M	M	M	R	T	Q	Y	Q	L	-1031.32
522	I	C	Y	S	A	Q	F	Q	L	-1031.32
523	I	C	M	A	A	E	Y	Q	L	-1031.32
524	V	F	F	S	A	C	Y	L	A	-1031.3
525	I	F	F	A	S	G	Y	Q	F	-1031.3
526	I	M	W	A	A	A	Y	Q	M	-1031.3
527	M	C	F	R	T	G	F	Q	L	-1031.3
528	V	F	M	R	G	Q	Y	Q	L	-1031.3
529	V	M	Y	S	A	A	Y	E	L	-1031.3
530	I	L	F	R	A	Q	Y	I	L	-1031.3
531	M	M	M	R	A	A	Y	L	L	-1031.29
532	I	L	M	R	A	Q	Y	Q	L	-1031.29
533	V	F	S	R	A	C	F	Q	L	-1031.29
534	V	F	Y	A	A	A	Y	I	L	-1031.28
535	V	A	M	R	T	Q	Y	Q	L	-1031.28
536	I	F	Y	S	A	S	Y	Q	I	-1031.27
537	I	F	M	R	A	G	H	Q	L	-1031.26
538	V	F	Y	S	A	Q	Y	I	M	-1031.26
539	V	F	F	R	S	N	Y	Q	M	-1031.25
540	M	F	F	S	A	C	F	Q	L	-1031.25
541	V	M	M	S	T	C	F	Q	L	-1031.25
542	I	M	M	R	A	S	F	Q	L	-1031.25
543	M	A	F	S	A	A	F	Q	L	-1031.25
544	V	F	S	S	A	E	F	Q	K	-1031.25
545	T	M	F	R	A	C	Y	L	L	-1031.25
546	W	F	Y	S	A	G	A	I	L	-1031.24
547	V	F	F	S	A	E	H	E	L	-1031.24
548	I	M	M	A	A	Q	Y	L	L	-1031.24
549	V	M	Y	A	A	E	Y	I	L	-1031.24
550	V	M	Y	A	A	S	F	L	L	-1031.24
551	M	F	F	A	S	G	F	Q	L	-1031.24
552	I	F	Y	S	A	E	A	Q	L	-1031.23
553	V	M	M	R	A	Q	F	Q	M	-1031.23
554	I	A	F	A	S	S	Y	Q	L	-1031.23
555	M	F	F	A	T	G	Y	Q	L	-1031.23
556	V	M	F	R	A	E	Y	Q	K	-1031.23
557	M	F	Y	S	A	G	Y	Q	F	-1031.23
558	V	F	S	S	A	A	Y	L	R	-1031.22
559	I	F	F	S	A	G	Y	E	K	-1031.22
560	V	F	W	A	A	G	F	L	L	-1031.21
561	V	A	F	S	S	E	Y	Q	L	-1031.2
562	I	M	F	S	T	Q	F	E	L	-1031.19
563	W	M	F	A	T	A	F	Q	L	-1031.19
564	V	M	Y	R	A	A	Y	Q	K	-1031.19
565	V	F	F	R	S	A	Y	Q	F	-1031.18
566	V	M	F	R	A	N	Y	L	L	-1031.18
567	V	A	M	R	G	E	Y	Q	L	-1031.18
568	V	F	W	S	S	A	Y	Q	L	-1031.18
569	V	F	F	S	A	C	Y	E	M	-1031.17
570	I	A	Y	S	A	N	F	Q	L	-1031.17
571	W	M	F	S	T	A	A	I	L	-1031.16
572	I	F	F	S	A	S	Y	E	I	-1031.16
573	I	L	M	S	S	E	Y	Q	L	-1031.16
574	I	A	W	S	A	E	Y	Q	M	-1031.16
575	I	F	F	A	A	G	A	Q	M	-1031.16
576	V	F	Y	A	A	G	F	E	L	-1031.16
577	I	F	F	S	A	G	A	Q	L	-1031.15
578	I	A	F	R	A	S	F	Q	L	-1031.15
579	I	A	M	S	A	N	Y	E	L	-1031.14
580	V	M	F	R	T	Q	Y	Q	L	-1031.13
581	V	F	F	A	A	Q	Y	V	M	-1031.13
582	V	F	F	R	A	G	F	E	M	-1031.12
583	V	F	S	A	A	S	Y	Q	R	-1031.12
584	M	M	F	A	A	A	Y	L	K	-1031.11
585	M	M	F	R	T	G	F	L	L	-1031.11
586	V	F	F	S	S	A	Y	V	L	-1031.11
587	I	M	F	S	A	Q	F	E	M	-1031.11
588	V	F	F	A	T	G	F	L	L	-1031.11
589	I	F	M	S	A	A	Y	I	L	-1031.11
590	V	F	F	A	A	A	Y	V	K	-1031.1
591	I	A	M	S	T	G	F	Q	L	-1031.09
592	V	M	F	R	S	Q	F	E	L	-1031.09
593	M	F	Y	S	S	G	Y	Q	L	-1031.09
594	V	F	M	A	A	C	Y	Q	M	-1031.09
595	I	F	F	S	G	E	Y	E	L	-1031.08
596	V	F	S	R	A	Q	Y	Q	A	-1031.08
597	I	F	F	A	A	G	F	Q	A	-1031.08
598	M	M	Y	A	A	S	F	Q	L	-1031.08
599	W	M	F	A	A	Q	A	Q	A	-1031.08
600	V	F	F	A	A	C	Y	I	L	-1031.07
601	I	F	F	S	S	E	Y	M	L	-1031.07
602	V	F	F	A	A	Q	Y	M	L	-1031.07
603	I	M	Y	R	T	G	F	Q	L	-1031.07
604	W	M	F	R	A	A	F	L	L	-1031.07
605	I	F	F	S	A	E	A	L	L	-1031.06
606	I	M	Y	R	A	Q	Y	Q	A	-1031.06
607	V	F	Y	S	A	N	F	E	L	-1031.06
608	I	M	F	S	A	Q	F	M	R	-1031.06
609	I	M	F	R	T	S	Y	I	L	-1031.06
610	I	A	F	S	T	E	Y	Q	F	-1031.05
611	I	F	M	S	A	G	Y	E	L	-1031.04
612	W	A	Y	S	A	A	A	Q	L	-1031.04
613	I	M	Y	R	A	G	F	Q	M	-1031.04
614	V	F	F	A	A	N	Y	L	M	-1031.04
615	W	F	W	S	A	K	A	Q	L	-1031.04
616	I	A	Y	A	A	G	F	Q	L	-1031.03
617	W	M	F	R	A	A	A	Q	F	-1031.03
618	I	F	F	S	S	Q	Y	Q	F	-1031.03
619	V	F	F	A	A	A	Y	I	I	-1031.03
620	I	M	F	S	S	S	F	Q	L	-1031.03
621	W	F	F	S	S	A	H	Q	L	-1031.03
622	W	M	Y	S	A	Q	A	Q	K	-1031.02
623	V	F	F	A	T	E	Y	V	L	-1031.02
624	V	F	F	A	T	G	Y	L	M	-1031.02
625	V	L	F	R	S	N	Y	Q	L	-1031.02
626	I	M	F	R	A	S	Y	E	M	-1031.02
627	I	F	W	S	S	S	Y	Q	L	-1031.02
628	M	F	F	S	A	A	Y	V	A	-1031.02
629	M	F	M	R	A	K	Y	Q	L	-1031.01
630	M	F	F	R	S	E	Y	Q	L	-1031.01
631	V	F	S	A	T	E	Y	Q	L	-1031.01
632	V	F	F	A	A	E	Y	T	K	-1031.01
633	V	F	F	R	A	Q	H	Q	L	-1031.01
634	V	L	F	R	A	A	F	Q	L	-1031.01
635	V	A	F	R	A	Q	F	Q	K	-1031
636	I	M	Y	A	A	N	Y	E	L	-1031
637	V	A	F	R	T	Q	Y	E	L	-1031
638	I	F	M	S	S	N	Y	Q	L	-1030.99
639	I	F	F	A	A	E	Y	M	L	-1030.98
640	M	M	F	R	A	A	V	L	L	-1030.97
641	I	M	F	R	A	A	Y	V	L	-1030.97
642	V	F	M	R	A	G	F	E	L	-1030.97
643	V	M	F	R	A	Q	F	E	K	-1030.97
644	V	A	M	S	A	Q	F	E	L	-1030.97
645	V	F	W	S	S	E	Y	Q	K	-1030.97
646	V	M	M	A	A	E	F	Q	R	-1030.96
647	T	F	F	S	A	C	Y	Q	L	-1030.96
648	V	F	Y	S	A	E	A	L	L	-1030.96
649	I	M	M	S	T	E	Y	Q	K	-1030.96
650	V	F	F	A	A	G	Y	T	M	-1030.95
651	V	M	Y	S	A	N	F	L	L	-1030.95
652	W	M	Y	S	A	S	A	Q	L	-1030.95
653	I	F	F	R	A	Q	Y	M	L	-1030.95
654	I	M	W	R	A	A	Y	Q	L	-1030.94
655	V	F	F	R	A	Q	Y	V	R	-1030.94
656	I	A	F	S	A	Q	F	Q	A	-1030.93
657	V	A	F	R	G	E	F	Q	L	-1030.93
658	V	A	Y	A	A	E	Y	Q	M	-1030.92
659	I	A	M	R	T	G	Y	Q	L	-1030.92
660	W	A	F	A	T	G	A	Q	L	-1030.92
661	I	F	Y	S	S	G	F	Q	L	-1030.91
662	I	A	F	S	A	E	Y	E	K	-1030.91
663	I	M	F	R	A	E	Y	E	R	-1030.9
664	V	F	F	A	A	G	F	Q	M	-1030.9
665	I	M	F	R	T	G	Y	Q	M	-1030.9
666	V	C	Y	R	A	Q	Y	L	L	-1030.9
667	V	F	Y	A	A	Q	Y	L	L	-1030.89
668	M	F	Y	S	A	K	F	Q	L	-1030.88
669	V	M	M	R	T	S	Y	I	L	-1030.88
670	W	F	F	S	A	G	A	E	A	-1030.88
671	V	F	S	S	T	G	Y	E	L	-1030.88
672	W	M	Y	A	A	A	F	Q	L	-1030.88
673	V	F	F	A	T	Q	Y	Q	L	-1030.87
674	I	M	F	R	A	Q	F	M	L	-1030.87
675	V	F	F	S	A	C	F	E	F	-1030.87
676	V	F	M	S	T	G	F	E	L	-1030.87
677	I	L	F	S	A	E	Y	E	L	-1030.87
678	M	F	F	S	S	A	Y	I	L	-1030.86
679	V	F	F	A	A	Q	Y	E	R	-1030.86
680	V	L	F	R	A	Q	Y	Q	L	-1030.86
681	V	A	F	R	A	A	Y	L	L	-1030.86
682	V	M	Y	A	A	S	Y	L	K	-1030.85
683	V	A	Y	R	S	N	Y	Q	L	-1030.85
684	V	F	M	S	A	E	Y	Q	M	-1030.84
685	I	A	F	R	T	S	Y	Q	L	-1030.84
686	V	F	F	S	S	A	Y	E	A	-1030.84
687	I	M	F	A	T	S	F	Q	L	-1030.84
688	I	M	W	A	A	N	F	Q	L	-1030.83
689	I	A	F	S	T	A	Y	Q	M	-1030.83
690	I	A	F	S	A	S	H	Q	L	-1030.83
691	I	A	F	A	A	E	Y	L	L	-1030.83
692	V	M	M	R	T	G	Y	L	M	-1030.83
693	M	F	S	S	T	G	Y	Q	R	-1030.83
694	V	M	Y	R	A	Q	F	Q	A	-1030.83
695	I	M	Y	S	A	A	F	E	L	-1030.82
696	V	M	M	R	T	A	F	Q	L	-1030.82
697	V	F	S	S	A	E	Y	E	L	-1030.82
698	M	M	F	R	A	S	F	L	L	-1030.81
699	T	F	F	S	A	C	F	L	L	-1030.81
700	I	M	F	S	A	S	Y	E	K	-1030.81
701	T	F	F	A	A	G	F	Q	L	-1030.8
702	I	A	F	R	A	Q	Y	E	L	-1030.8
703	T	F	Y	S	A	C	F	Q	L	-1030.8
704	I	M	M	R	A	G	Y	Q	L	-1030.8
705	V	F	M	S	A	C	F	Q	L	-1030.8
706	I	M	W	S	A	E	F	Q	L	-1030.79
707	V	F	F	R	S	E	Y	Q	A	-1030.79
708	M	F	F	R	A	G	F	Q	L	-1030.79
709	I	M	F	R	S	A	Y	Q	A	-1030.78
710	I	A	F	R	A	S	Y	L	L	-1030.78
711	V	A	F	R	A	E	Y	L	R	-1030.78
712	I	A	F	S	A	E	Y	I	M	-1030.78
713	I	F	F	S	S	C	H	Q	L	-1030.78
714	M	F	F	S	A	E	Y	E	M	-1030.78
715	V	M	F	S	S	S	F	L	K	-1030.77
716	V	A	F	R	A	E	F	L	L	-1030.77
717	I	M	Y	R	A	N	Y	I	L	-1030.77
718	V	F	Y	S	A	C	Y	I	L	-1030.77
719	V	F	Y	S	A	G	Y	Q	R	-1030.77
720	V	F	W	S	A	C	Y	E	L	-1030.77
721	V	F	F	A	A	G	Y	L	R	-1030.76
722	T	F	F	R	A	Q	Y	L	L	-1030.76
723	I	C	Y	S	A	E	Y	Q	R	-1030.76
724	M	F	Y	S	A	E	Y	Q	K	-1030.76
725	V	A	F	S	A	E	Y	V	M	-1030.76
726	M	M	F	R	T	S	Y	L	L	-1030.75
727	I	M	M	R	A	N	Y	Q	M	-1030.75
728	V	A	M	S	A	Q	F	Q	M	-1030.75
729	V	A	F	R	A	S	Y	L	M	-1030.74
730	V	A	F	A	T	S	Y	Q	L	-1030.74
731	V	F	F	R	T	G	V	Q	L	-1030.74
732	I	F	F	S	A	Q	H	E	L	-1030.74
733	I	F	M	S	A	A	Y	Q	M	-1030.74
734	I	F	F	R	T	G	H	Q	L	-1030.74
735	V	F	Y	S	A	S	V	Q	L	-1030.73
736	V	M	F	R	S	Q	Y	L	L	-1030.73
737	I	M	M	A	A	A	Y	Q	L	-1030.73
738	V	A	M	R	A	E	Y	Q	I	-1030.73
739	V	F	Y	G	A	E	Y	Q	A	-1030.72
740	I	F	S	A	A	E	Y	Q	L	-1030.71
741	I	M	Y	S	S	Q	Y	E	L	-1030.71
742	I	M	F	A	A	S	Y	Q	R	-1030.71
743	V	M	Y	R	S	C	F	Q	L	-1030.71
744	I	M	Y	R	A	N	H	Q	L	-1030.71
745	I	F	Y	A	S	G	Y	Q	L	-1030.69
746	I	A	M	A	A	G	Y	Q	L	-1030.69
747	I	F	F	A	A	Q	H	Q	L	-1030.69
748	M	F	F	S	A	A	Y	I	K	-1030.68
749	W	C	F	A	A	A	H	Q	L	-1030.68
750	V	F	F	R	T	G	A	L	L	-1030.68
751	I	A	F	R	A	C	Y	Q	L	-1030.67
752	V	F	Y	R	A	G	F	Q	A	-1030.66
753	W	L	F	S	T	Q	A	Q	L	-1030.66
754	V	F	F	S	T	E	Y	L	M	-1030.66
755	M	F	F	S	A	G	Y	E	R	-1030.65
756	V	C	Y	S	A	S	Y	L	L	-1030.65
757	V	L	M	A	S	E	Y	Q	L	-1030.64
758	I	A	M	S	A	S	Y	Q	F	-1030.64
759	V	F	M	S	A	E	F	I	L	-1030.64
760	I	L	M	R	A	G	F	Q	L	-1030.63
761	M	F	S	S	A	G	Y	L	K	-1030.63
762	V	M	M	R	A	E	Y	M	M	-1030.63
763	M	M	Y	R	T	G	Y	E	L	-1030.62
764	V	F	Y	A	A	S	A	Q	L	-1030.62
765	V	F	W	R	S	Q	Y	Q	L	-1030.62
766	V	F	F	A	A	A	H	E	L	-1030.62
767	I	M	F	R	A	Q	F	Q	A	-1030.61
768	M	F	F	S	T	G	Y	L	K	-1030.61
769	I	A	F	S	S	S	Y	Q	R	-1030.61
770	V	M	F	A	A	E	F	M	M	-1030.61
771	V	M	Y	S	A	E	F	I	L	-1030.6
772	V	A	Y	R	A	G	F	Q	L	-1030.6
773	M	M	F	S	A	A	F	Q	M	-1030.6
774	M	F	F	S	A	S	A	E	L	-1030.6
775	V	F	F	G	A	E	Y	Q	L	-1030.59
776	W	M	Y	S	T	A	F	Q	L	-1030.59
777	I	F	F	S	T	E	Y	L	L	-1030.59
778	V	F	M	A	A	G	F	Q	K	-1030.59
779	W	A	F	S	A	N	A	L	L	-1030.59
780	I	A	F	A	T	E	Y	Q	L	-1030.58
781	I	M	M	S	A	Q	F	E	L	-1030.58
782	V	F	Y	A	A	Q	V	Q	L	-1030.58
783	V	L	Y	R	A	K	Y	Q	L	-1030.57
784	V	F	Y	S	S	S	Y	Q	M	-1030.57
785	V	F	W	S	S	E	Y	E	L	-1030.57
786	I	M	F	S	A	E	F	L	M	-1030.57
787	I	M	F	R	T	E	V	Q	L	-1030.57
788	V	M	Y	A	A	Q	Y	Q	K	-1030.57
789	M	L	F	R	A	G	Y	Q	M	-1030.56
790	I	F	F	S	T	A	F	Q	L	-1030.56
791	M	A	F	A	A	Q	F	Q	L	-1030.56
792	V	F	M	A	T	G	Y	E	L	-1030.55
793	W	C	F	S	A	K	A	L	L	-1030.55
794	V	M	F	R	S	N	F	Q	L	-1030.55
795	I	L	F	S	A	A	Y	I	L	-1030.55
796	I	M	Y	A	A	A	Y	I	L	-1030.55
797	V	F	W	S	A	Q	Y	V	L	-1030.55
798	M	F	F	S	A	E	V	L	L	-1030.55
799	I	A	M	S	A	S	F	Q	L	-1030.55
800	V	M	M	S	A	Q	Y	Q	R	-1030.54
801	V	F	M	R	A	Q	Y	I	L	-1030.54
802	T	M	F	A	A	C	Y	Q	L	-1030.54
803	W	M	F	A	T	G	A	L	L	-1030.54
804	V	F	Y	S	S	G	Y	L	M	-1030.53
805	V	F	Y	S	A	A	H	Q	M	-1030.52
806	I	M	Y	S	A	Q	Y	L	M	-1030.52
807	V	F	F	S	G	E	Y	Q	L	-1030.52
808	V	M	F	R	A	Q	F	I	L	-1030.52
809	I	F	F	S	T	G	Y	Q	A	-1030.52
810	V	A	Y	A	A	E	H	Q	L	-1030.51
811	I	L	Y	S	A	E	F	Q	L	-1030.51
812	W	M	F	A	S	A	A	Q	L	-1030.51
813	V	F	F	A	A	A	F	M	L	-1030.51
814	V	F	M	S	A	S	Y	L	R	-1030.5
815	I	M	W	S	T	E	Y	E	L	-1030.5
816	W	M	W	S	A	A	A	L	L	-1030.5
817	M	M	F	A	A	S	Y	Q	L	-1030.5
818	M	M	W	A	A	A	F	Q	L	-1030.49
819	V	F	F	R	A	C	Y	M	L	-1030.49
820	V	F	F	R	T	Q	Y	I	L	-1030.49
821	W	F	F	R	A	G	A	E	L	-1030.49
822	V	A	Y	A	S	E	Y	Q	L	-1030.48
823	V	F	F	A	A	G	F	L	A	-1030.48
824	I	M	Y	S	A	Q	Y	V	K	-1030.47
825	V	M	F	R	T	A	F	I	L	-1030.47
826	V	F	F	R	A	A	Y	V	A	-1030.47
827	M	M	Y	A	A	G	Y	Q	L	-1030.46
828	V	M	F	A	A	N	Y	Q	K	-1030.46
829	V	F	W	S	A	A	Y	L	L	-1030.46
830	M	F	M	S	A	A	Y	Q	K	-1030.45
831	V	A	F	S	A	E	F	L	M	-1030.45
832	V	A	F	R	A	Q	Y	I	L	-1030.45
833	I	A	Y	S	A	G	F	E	L	-1030.45
834	I	M	F	R	A	S	F	Q	F	-1030.45
835	V	F	M	S	S	A	Y	L	L	-1030.44
836	V	A	M	S	T	E	Y	Q	F	-1030.44
837	I	F	F	S	S	Q	F	Q	L	-1030.44
838	I	M	F	S	A	N	Y	Q	K	-1030.44
839	V	F	F	S	A	N	F	Q	L	-1030.43
840	V	F	M	S	A	G	F	E	K	-1030.43
841	I	A	W	S	T	E	Y	Q	L	-1030.43
842	V	F	M	A	A	G	Y	Q	L	-1030.43
843	V	A	Y	S	A	E	V	L	L	-1030.43
844	M	M	M	S	T	S	Y	Q	L	-1030.43
845	I	F	F	G	A	E	Y	E	L	-1030.43
846	V	M	F	R	A	Q	Y	E	M	-1030.43
847	V	M	M	S	T	Q	Y	Q	K	-1030.42
848	V	M	Y	R	S	S	Y	E	L	-1030.42
849	V	F	F	R	A	A	A	Q	L	-1030.42
850	I	F	F	S	A	C	Y	L	I	-1030.42
851	I	M	F	A	T	A	Y	Q	R	-1030.42
852	V	M	F	A	A	E	F	L	K	-1030.42
853	I	M	Y	S	A	G	Y	Q	K	-1030.42
854	V	F	F	S	S	S	F	M	L	-1030.41
855	V	A	W	R	A	S	Y	E	L	-1030.41
856	V	F	M	S	S	S	Y	I	L	-1030.41
857	V	F	Y	S	A	S	Y	E	R	-1030.41
858	V	F	M	R	A	G	Y	Q	K	-1030.4
859	V	A	Y	S	A	A	Y	Q	R	-1030.4
860	V	F	F	S	A	C	H	L	L	-1030.4
861	V	F	S	S	A	G	F	Q	L	-1030.4
862	V	A	Y	S	S	E	Y	Q	M	-1030.4
863	V	F	Y	A	A	G	A	L	L	-1030.4
864	V	F	W	S	A	A	Y	E	K	-1030.4
865	V	F	Y	R	A	S	Y	Q	M	-1030.4
866	V	A	F	S	A	Q	F	Q	L	-1030.39
867	V	F	M	S	A	A	Y	Q	F	-1030.39
868	V	F	F	S	A	E	A	Q	M	-1030.39
869	I	F	W	S	A	A	Y	Q	R	-1030.38
870	V	F	S	S	T	A	Y	Q	L	-1030.38
871	M	F	Y	S	T	G	Y	E	L	-1030.38
872	M	M	F	R	A	Q	Y	Q	M	-1030.37
873	V	M	Y	S	A	C	F	L	M	-1030.37
874	V	L	Y	R	A	E	Y	Q	I	-1030.37
875	V	F	M	S	T	S	Y	L	L	-1030.37
876	V	M	F	A	S	A	Y	L	M	-1030.36
877	V	A	F	S	A	Q	Y	E	L	-1030.36
878	V	F	M	R	A	E	H	Q	L	-1030.36
879	T	F	Y	S	T	A	Y	Q	L	-1030.36
880	V	F	Y	R	A	S	Y	M	L	-1030.36
881	V	F	W	R	A	E	Y	L	L	-1030.36
882	W	M	F	S	A	A	A	Q	R	-1030.35
883	V	M	F	A	A	Q	F	L	L	-1030.35
884	I	F	F	R	A	G	Y	E	M	-1030.35
885	V	F	F	R	T	A	F	Q	L	-1030.35
886	I	M	F	R	T	N	Y	Q	A	-1030.35
887	V	F	F	S	S	E	Y	V	A	-1030.34
888	V	M	Y	A	A	Q	Y	E	L	-1030.34
889	T	F	W	S	A	E	F	Q	L	-1030.34
890	V	M	Y	S	S	N	Y	E	L	-1030.34
891	W	M	F	R	A	S	F	Q	M	-1030.34
892	V	M	Y	R	T	N	F	Q	L	-1030.33
893	I	L	F	R	A	N	Y	L	L	-1030.33
894	T	F	M	R	A	A	Y	Q	L	-1030.33
895	V	F	Y	R	A	A	Y	Q	A	-1030.33
896	M	F	F	R	A	E	Y	L	L	-1030.33
897	V	M	F	S	S	Q	F	Q	L	-1030.32
898	V	F	W	S	A	C	Y	V	M	-1030.32
899	I	A	F	S	A	S	Y	V	L	-1030.32
900	V	F	Y	R	S	G	Y	I	L	-1030.32
901	V	F	Y	A	T	G	Y	Q	R	-1030.32
902	V	F	F	S	T	A	Y	L	K	-1030.32
903	V	A	Y	R	A	E	Y	Q	R	-1030.32
904	M	M	Y	R	A	S	Y	Q	L	-1030.31
905	I	C	F	A	A	S	Y	L	L	-1030.31
906	I	F	F	S	A	A	H	Q	A	-1030.31
907	V	L	F	R	T	A	Y	Q	M	-1030.31
908	M	L	F	R	A	E	Y	Q	L	-1030.3
909	V	A	Y	S	A	E	Y	L	M	-1030.3
910	T	F	W	S	A	Q	Y	L	L	-1030.3
911	I	A	Y	S	A	S	Y	L	L	-1030.3
912	V	M	F	A	A	N	Y	E	L	-1030.3
913	I	M	Y	A	A	G	F	E	L	-1030.29
914	M	A	M	A	A	G	Y	Q	K	-1030.29
915	I	C	F	A	A	E	Y	Q	R	-1030.29
916	V	A	F	A	A	E	Y	I	L	-1030.29
917	V	M	F	R	T	S	Y	L	M	-1030.29
918	I	L	Y	S	A	S	Y	E	L	-1030.29
919	M	M	Y	S	A	Q	Y	E	K	-1030.29
920	I	M	F	A	A	Q	Y	E	K	-1030.28
921	T	F	F	S	A	C	Y	L	M	-1030.28
922	V	M	Y	S	A	E	F	V	M	-1030.28
923	V	F	Y	S	A	G	F	L	K	-1030.27
924	V	A	M	S	S	E	F	Q	L	-1030.27
925	V	F	F	S	A	N	F	E	A	-1030.27
926	V	L	F	R	A	A	Y	V	L	-1030.27
927	I	M	Y	S	A	N	F	Q	K	-1030.26
928	V	M	M	R	A	C	Y	E	R	-1030.26
929	W	F	F	R	A	G	A	Q	M	-1030.26
930	I	M	F	A	A	E	F	Q	F	-1030.26
931	I	F	W	A	A	G	Y	Q	R	-1030.26
932	I	M	M	A	S	E	Y	Q	L	-1030.25
933	V	A	W	R	A	Q	Y	Q	L	-1030.25
934	M	M	Y	S	A	A	F	L	L	-1030.25
935	V	M	W	A	A	E	Y	Q	L	-1030.24
936	V	C	Y	R	A	K	Y	E	L	-1030.24
937	V	F	M	S	T	Q	Y	Q	M	-1030.24
938	V	F	W	S	A	S	F	Q	L	-1030.24
939	I	L	Y	A	A	E	Y	Q	L	-1030.24
940	M	M	M	A	A	Q	F	Q	L	-1030.24
941	V	F	F	R	A	E	Y	M	R	-1030.24
942	I	F	Y	A	A	G	Y	Q	A	-1030.24
943	V	F	M	R	A	Q	Y	Q	F	-1030.24
944	V	M	M	A	A	Q	F	Q	K	-1030.24
945	I	F	S	S	A	E	F	Q	L	-1030.23
946	I	M	Y	S	A	A	Y	E	M	-1030.23
947	V	C	M	R	A	E	F	Q	L	-1030.23
948	I	M	F	R	A	A	Y	E	A	-1030.23
949	I	F	Y	S	T	G	Y	Q	M	-1030.23
950	M	M	M	S	A	A	Y	V	R	-1030.23
951	I	A	F	S	A	S	Y	Q	K	-1030.22
952	M	M	M	R	A	E	Y	Q	M	-1030.22
953	I	M	Y	R	S	G	Y	Q	M	-1030.22
954	V	M	Y	R	T	S	Y	Q	M	-1030.22
955	M	C	F	R	A	A	Y	E	L	-1030.22
956	W	M	F	R	S	Q	A	Q	L	-1030.22
957	V	M	F	A	S	S	F	Q	L	-1030.22
958	I	M	F	R	S	G	F	E	L	-1030.21
959	V	M	F	R	T	S	Y	V	L	-1030.21
960	I	F	F	S	A	N	Y	Q	F	-1030.21
961	M	F	S	A	A	G	Y	L	L	-1030.21
962	T	F	F	S	A	Q	F	Q	L	-1030.21
963	I	F	Y	S	A	G	F	Q	A	-1030.2
964	I	F	F	R	T	G	Y	T	L	-1030.2
965	V	F	Y	R	A	G	Y	L	F	-1030.2
966	I	F	F	S	A	G	H	E	R	-1030.2
967	V	A	F	A	S	Q	F	Q	L	-1030.19
968	V	A	Y	S	A	E	Y	Q	I	-1030.19
969	V	A	F	R	A	N	F	Q	L	-1030.18
970	V	M	F	A	T	E	F	E	L	-1030.18
971	W	F	Y	S	A	G	A	Q	F	-1030.18
972	I	F	M	S	T	G	Y	Q	R	-1030.18
973	V	M	F	A	A	G	F	L	M	-1030.18
974	V	M	Y	A	A	Q	F	Q	M	-1030.17
975	I	A	F	S	A	S	Y	M	M	-1030.17
976	M	F	W	S	A	G	Y	L	R	-1030.17
977	M	F	S	R	A	Q	Y	Q	L	-1030.17
978	T	F	F	A	A	C	Y	Q	M	-1030.17
979	I	A	F	S	A	E	F	L	L	-1030.17
980	I	F	M	S	A	C	Y	Q	R	-1030.17
981	I	F	F	S	A	Q	Y	I	L	-1030.17
982	V	F	Y	S	A	Q	F	Q	I	-1030.17
983	V	A	F	S	A	S	F	M	L	-1030.16
984	I	M	F	A	T	C	Y	Q	L	-1030.16
985	I	M	F	R	A	A	Y	Q	I	-1030.16
986	W	M	F	S	T	A	F	E	L	-1030.16
987	V	F	F	S	A	S	F	Q	I	-1030.15
988	M	F	F	S	A	C	Y	L	K	-1030.15
989	V	F	W	A	A	S	H	Q	L	-1030.15
990	M	F	S	S	A	A	Y	Q	R	-1030.15
991	M	M	M	S	A	S	F	Q	M	-1030.15
992	I	M	Y	S	A	G	F	L	M	-1030.14
993	V	A	F	S	T	E	F	L	L	-1030.14
994	V	F	F	S	A	A	Y	L	F	-1030.14
995	I	F	Y	A	A	G	V	Q	L	-1030.14
996	I	M	W	A	S	Q	Y	Q	L	-1030.14
997	W	F	F	S	A	S	A	Q	A	-1030.13
998	V	F	Y	S	A	S	Y	I	K	-1030.13
999	M	A	F	A	T	G	Y	E	L	-1030.13
1000	V	A	Y	A	A	E	Y	V	L	-1030.13
